# Supplementary material
Source: MDPI journal article supplement (https://www.mdpi.com/2075-5309/14/5/1283)
Supplement: s1 [file s1]

**Supplementary Materials for**  
**Quantitative Accident Risk Estimation for Infrastructure Facilities**  
**Based on Accident Case Analysis**

Jeongung Lee and Jaewook Jeong\*

Department of Safety Engineering, Seoul National University of Science and Technology  
232 Gongneung-ro, Nowon-gu, Seoul 01811, Republic of Korea; mantoasia@seoultech.ac.kr

\*Correspondence: jaewook.jeong@seoultech.ac.kr; Tel.: +82-2-9706381

5 pages

5 tables

**TABLE Captions**

Table S1 Accident data by facility type

Table S2 Annual construction cost by facility type

Table S3 Construction cost classification by collected data

Table S4 Recalculated NAFC and CCC by proposed cost classification

Table S5 Recalculated FRC and CRC by proposed cost classification

**Table S1.** Accident data by facility type

| <b>Div.</b>               | <b>number of fatalities</b> | <b>number of injuries</b> |
|---------------------------|-----------------------------|---------------------------|
| Bridge                    | 53                          | 302                       |
| Dam                       | 11                          | 37                        |
| Road                      | 122                         | 708                       |
| Water and sewage          | 119                         | 714                       |
| Retaining wall            | 23                          | 132                       |
| Railroad                  | 33                          | 137                       |
| Tunnel                    | 33                          | 236                       |
| River                     | 31                          | 215                       |
| Port and harbor           | 19                          | 157                       |
| Miscellaneous facilities  | 68                          | 347                       |
| Infrastructure facilities | 512                         | 2993                      |

**Table S2.** Annual construction cost by facility type

| <b>Div.</b>               | <b>construction cost (million dallars)</b> |             |             |             |             |             | <b>Sum</b> |
|---------------------------|--------------------------------------------|-------------|-------------|-------------|-------------|-------------|------------|
|                           | <b>2016</b>                                | <b>2017</b> | <b>2018</b> | <b>2019</b> | <b>2020</b> | <b>2021</b> |            |
| Bridge                    | 1241.63                                    | 1327.42     | 1282.26     | 1187.02     | 1257.45     | 1269.28     | 7565.05    |
| Dam                       | 223.73                                     | 136.87      | 129.49      | 134.18      | 168.43      | 158.99      | 951.69     |
| Road                      | 7204.92                                    | 6037.56     | 4891.09     | 5524.88     | 6029.26     | 5902.92     | 35,590.63  |
| Water and sewage          | 1590.86                                    | 1502.46     | 1628.80     | 1843.70     | 1911.29     | 1980.80     | 10,457.91  |
| Retaining wall            | 2560.68                                    | 2547.47     | 2547.62     | 2476.73     | 2297.85     | 2361.21     | 14,791.55  |
| Railroad                  | 2788.33                                    | 2756.84     | 2593.47     | 2268.97     | 1833.49     | 1798.62     | 14,039.71  |
| Tunnel                    | 904.07                                     | 854.69      | 912.90      | 809.60      | 746.01      | 697.31      | 4924.58    |
| River                     | 1720.66                                    | 1607.07     | 1447.31     | 1471.04     | 1581.95     | 1746.24     | 9574.27    |
| Port and harbor           | 1028.96                                    | 1191.40     | 1368.05     | 1437.56     | 1338.25     | 1496.93     | 7861.14    |
| Miscellaneous facilities  | 6011.52                                    | 6399.46     | 6723.58     | 6954.38     | 6683.56     | 6463.21     | 39,235.71  |
| Infrastructure facilities | 25,275.35                                  | 24,361.21   | 23,524.58   | 24,108.06   | 23,847.54   | 23,875.50   | 144,992.24 |

Note: The exchange rate (KRW/USD) is KRW 1302 to USD 1 (as of 7 August 2023).

**Table S3.** Construction cost classification by collected data

| <b>Construction Cost Classification (million dallars)</b> |                                             |                                         |
|-----------------------------------------------------------|---------------------------------------------|-----------------------------------------|
| <b>1<sup>st</sup> Accident data(MOLIT)</b>                | <b>2<sup>nd</sup> Accident data(COMWEL)</b> | <b>Construction Cost data(CAK)</b>      |
| Less than 0.01                                            | Less than 0.01                              | Less than 0.03                          |
| Not less than 0.01 and less than 0.02                     | Not less than 0.01 and less than 0.02       |                                         |
| Not less than 0.02 and less than 0.03                     | Not less than 0.02 and less than 0.03       |                                         |
| Not less than 0.03 and less than 0.08                     | Not less than 0.03 and less than 0.08       | Not less than 0.03 and less than 0.04   |
|                                                           |                                             | Not less than 0.04 and less than 0.08   |
| Not less than 0.08 and less than 0.15                     | Not less than 0.08 and less than 0.15       | Not less than 0.08 and less than 0.15   |
| Not less than 0.15 and less than 0.23                     | Not less than 0.15 and less than 0.23       | Not less than 0.15 and less than 0.38   |
| Not less than 0.23 and less than 0.38                     | Not less than 0.23 and less than 0.38       |                                         |
| Not less than 0.38 and less than 0.77                     | Not less than 0.38 and less than 0.77       | Not less than 0.38 and less than 0.77   |
| Not less than 0.77 and less than 1.54                     | Not less than 0.77 and less than 1.54       | Not less than 0.77 and less than 2.30   |
| Not less than 1.54 and less than 3.84                     | Not less than 1.54 and less than 3.84       | Not less than 2.30 and less than 3.84   |
| Not less than 3.84 and less than 7.68                     | Not less than 3.84 and less than 7.68       | Not less than 3.84 and less than 7.68   |
| Not less than 7.68 and less than 11.52                    | Not less than 7.68 and less than 9.22       | Not less than 7.68 and less than 15.36  |
|                                                           | Not less than 9.22 and less than 11.52      |                                         |
| Not less than 11.52 and less than 15.36                   | Not less than 11.52 and less than 15.36     | Not less than 15.36 and less than 38.40 |
| Not less than 15.36 and less than 23.04                   | Not less than 15.36 and less than 23.04     |                                         |
| Not less than 23.04 and less than 38.40                   | Not less than 23.04 and less than 38.40     |                                         |
| Not less than 38.40 and less than 76.80                   | Not less than 38.40 and less than 76.80     | Not less than 38.40 and less than 76.80 |
| Not less than 76.80                                       | Not less than 76.80                         | Not less than 76.80                     |

Note: The exchange rate (KRW/USD) is KRW 1302 to USD 1 (as of 7 August 2023).

**Table S4.** Recalculated NAFC\* and CCC\*\* by proposed cost classification

| Facility type             |      | Proposed Cost Classification*** |         |         |         |        |
|---------------------------|------|---------------------------------|---------|---------|---------|--------|
|                           |      | PC-1                            | PC-2    | PC-3    | PC-4    | PC-5   |
| Bridge                    | NAFC | 3.25                            | 1.18    | 1.18    | 0.89    | 1.33   |
|                           | CCC  | 182.74                          | 474.65  | 400.81  | 184.50  | 18.14  |
| Dam                       | NAFC | 0.59                            | 0.15    | 0.44    | 0.30    | 0.15   |
|                           | CCC  | 35.83                           | 94.39   | 25.38   | 3.01    | 3.01   |
| Road                      | NAFC | 6.64                            | 4.13    | 1.62    | 3.40    | 1.48   |
|                           | CCC  | 942.38                          | 1636.10 | 1734.45 | 1292.83 | 326.01 |
| Water and sewage          | NAFC | 5.76                            | 3.84    | 5.02    | 2.21    | 0.74   |
|                           | CCC  | 336.15                          | 927.55  | 374.01  | 80.71   | 24.56  |
| Retaining wall            | NAFC | 1.03                            | 1.33    | 0.30    | 0.44    | 0.30   |
|                           | CCC  | 148.59                          | 572.32  | 961.66  | 740.09  | 42.59  |
| Railroad                  | NAFC | 0.59                            | 0.44    | 0.44    | 1.48    | 1.62   |
|                           | CCC  | 44.10                           | 390.45  | 691.05  | 851.09  | 363.26 |
| Tunnel                    | NAFC | 0.44                            | 0.30    | 0.15    | 1.77    | 1.77   |
|                           | CCC  | 29.47                           | 188.24  | 265.91  | 294.79  | 42.36  |
| River                     | NAFC | 1.48                            | 0.89    | 2.07    | 0.15    | 0.00   |
|                           | CCC  | 567.40                          | 887.88  | 134.68  | 5.76    | 5.76   |
| Port and harbor           | NAFC | 0.74                            | 0.30    | 0.59    | 0.74    | 0.44   |
|                           | CCC  | 137.81                          | 441.15  | 369.78  | 281.69  | 79.75  |
| Miscellaneous facilities  | NAFC | 4.28                            | 1.33    | 1.03    | 1.92    | 1.03   |
|                           | CCC  | 1594.20                         | 1919.99 | 1716.46 | 1216.03 | 92.60  |
| Infrastructure facilities | NAFC | 24.81                           | 13.88   | 12.85   | 13.29   | 8.86   |
|                           | CCC  | 4018.68                         | 7532.73 | 6674.19 | 4950.50 | 989.27 |

Note: The exchange rate (KRW/USD) is KRW 1302 to USD 1 (as of 7 August 2023). \*NAFC is the number of annualized fatalities by cost classification, and the unit is person/year. \*\*CCC is the annual construction cost by cost classification, and the unit is million dollars/year. \*\*\* Proposed Cost Classification is confirmed in Table 7.

**Table S5.** Recalculated FRC\* and CRC\*\* by proposed cost classification\*\*\*

| Facility type             |     | Proposed Cost Classification |         |         |         |         |
|---------------------------|-----|------------------------------|---------|---------|---------|---------|
|                           |     | PC-1                         | PC-2    | PC-3    | PC-4    | PC-5    |
| Bridge                    | FRC | 0.01778                      | 0.00249 | 0.00295 | 0.00480 | 0.07326 |
|                           | CRC | 0.14494                      | 0.37646 | 0.31789 | 0.14633 | 0.01439 |
| Dam                       | FRC | 0.01648                      | 0.00156 | 0.01745 | 0.09817 | 0.04908 |
|                           | CRC | 0.22169                      | 0.58403 | 0.15706 | 0.01861 | 0.00319 |
| Road                      | FRC | 0.00705                      | 0.00253 | 0.00094 | 0.00263 | 0.00453 |
|                           | CRC | 0.15887                      | 0.27582 | 0.29240 | 0.21795 | 0.05496 |
| Water and sewage          | FRC | 0.01713                      | 0.00414 | 0.01342 | 0.02744 | 0.03005 |
|                           | CRC | 0.19286                      | 0.53216 | 0.21458 | 0.04631 | 0.01409 |
| Retaining wall            | FRC | 0.00696                      | 0.00232 | 0.00031 | 0.00060 | 0.00693 |
|                           | CRC | 0.06027                      | 0.23216 | 0.39009 | 0.30021 | 0.01728 |
| Railroad                  | FRC | 0.01339                      | 0.00113 | 0.00064 | 0.00173 | 0.00447 |
|                           | FRC | 0.01885                      | 0.16686 | 0.29533 | 0.36372 | 0.15524 |
| Tunnel                    | CRC | 0.01503                      | 0.00157 | 0.00056 | 0.00601 | 0.04183 |
|                           | FRC | 0.03590                      | 0.22934 | 0.32398 | 0.35917 | 0.05161 |
| River                     | FRC | 0.00260                      | 0.00100 | 0.01535 | 0.02563 | 0.00000 |
|                           | CRC | 0.35430                      | 0.55441 | 0.08410 | 0.00360 | 0.00360 |
| Port and harbor           | FRC | 0.00536                      | 0.00067 | 0.00160 | 0.00262 | 0.00555 |
|                           | CRC | 0.10519                      | 0.33671 | 0.28223 | 0.21500 | 0.06087 |
| Miscellaneous facilities  | FRC | 0.00269                      | 0.00069 | 0.00060 | 0.00158 | 0.01116 |
|                           | CRC | 0.24379                      | 0.29361 | 0.26248 | 0.18596 | 0.01416 |
| Infrastructure facilities | FRC | 0.00617                      | 0.00184 | 0.00192 | 0.00268 | 0.00896 |
|                           | CRC | 0.16630                      | 0.31172 | 0.27619 | 0.20486 | 0.04094 |

Note: The exchange rate (KRW/USD) is KRW 1302 to USD 1 (as of 7 August 2023). \*FRC is the fatality rate by cost classification, and the unit is person/ million dollars.

\*\*CRC is the construction rate by cost classification. \*\*\* Proposed Cost Classification is confirmed in Table 7.
